# Supplementary material for: Hierarchical carbon nanotube hybrid films for high-performance all-solid-state supercapacitors
Source: Royal Society of Chemistry journal article supplement (doi:10.1039/c7ra10581a), 2017-01-01
Supplement: c7ra10581a1.pdf [file c7ra10581a1.pdf]

## Supplementary information

### **Hierarchical Carbon Nanotube Hybrid Films for High-Performance All-Solid-State Supercapacitors**

Susheng Zhou<sup>ab</sup>, Sha Zeng<sup>b</sup>, Silan Zhang<sup>b</sup>, Jian Qiao<sup>b</sup>, Jiangtao Di<sup>b\*</sup>, Minghai Chen<sup>b\*</sup>, Ning Liu<sup>a\*</sup>, Qingwen Li<sup>b</sup>

<sup>a</sup> School of Materials Science and Engineering, Hefei University of Technology, Hefei 230009, People's Republic of China. E-mail: liuning@hfut.edu.cn (Ning Liu)

<sup>b</sup> Suzhou Institute of Nano-tech and Nano-bionics, Chinese Academy of Sciences, Suzhou 215123, People's Republic of China. E-mail: jtdi2009@sinano.ac.cn (Jiangtao Di) E-mail: mhchen2008@sinano.ac.cn (Minghai Chen)

#### **Specific capacitance of SWNTs in hybrid films:**

As compared to SWNT, MWNT have a low specific capacitance due to its low specific surface area. Besides, the specific capacitance of MWNT could be considered constant within a certain amount of content because it possess abundant macropores and could be contacted with electrolyte rapidly. In a hybrid film, the specific capacitance of MWNTs ( $C_m$ ) could be considered constant according to above premise. Herein, the specific capacitance of SWNTs ( $C_s$ ) in a hybrid film could be calculated by following formula:  $C_h = C_s \times \alpha + C_m \times (1 - \alpha)$ . Where  $\alpha$  is the proportion of SWCNTs and  $C_h$  is the specific capacitance of hybrid film. For example, when  $\alpha$  is 10 wt%,  $C_h$ ,  $C_m$  are 35.0 F/g, 21.2 F/g respectively,  $C_s = (C_h - C_m \times (1 - \alpha)) / \alpha = (35.0 - 21.2 \times 0.9) / 0.1 = 159.2$  (F/g). When  $\alpha$  is 30 wt%,  $C_h$ ,  $C_m$  are 41.6 F/g, 21.2 F/g respectively,  $C_s = (C_h - C_m \times (1 - \alpha)) / \alpha = (41.6 - 21.2 \times 0.7) / 0.3 = 104.2$  (F/g).

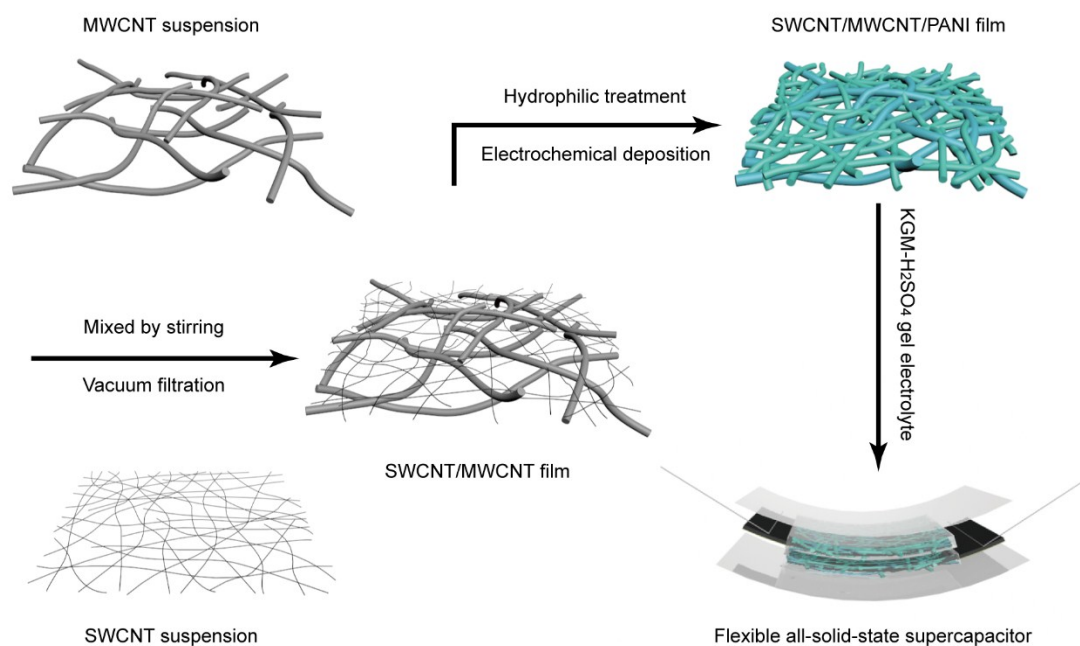

**Fig. S1.** Schematic illustration showing the preparation process of CNT/PANI flexible all-solid-state super-capacitor.

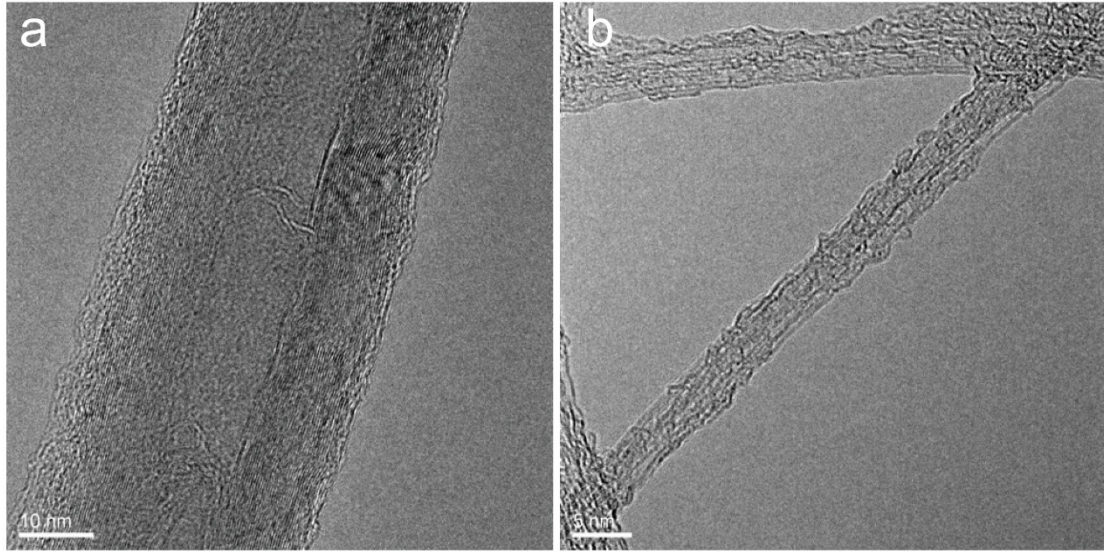

**Fig. S2.** TEM of MWNT (diameter of 50 nm) and SWNT (bundle diameter of 5 nm)

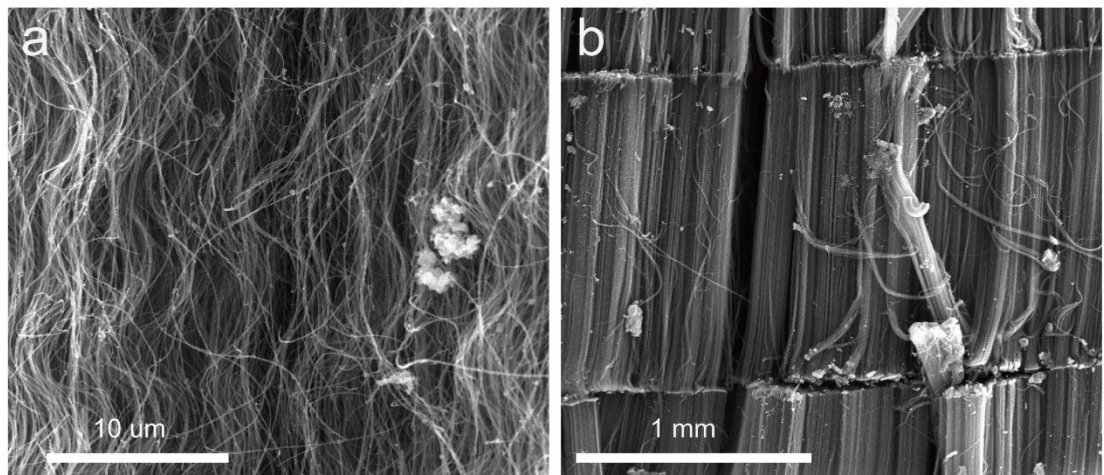

**Fig. S3.** SEM of vertically aligned MWNT with large porosity and its height is about 1 mm.

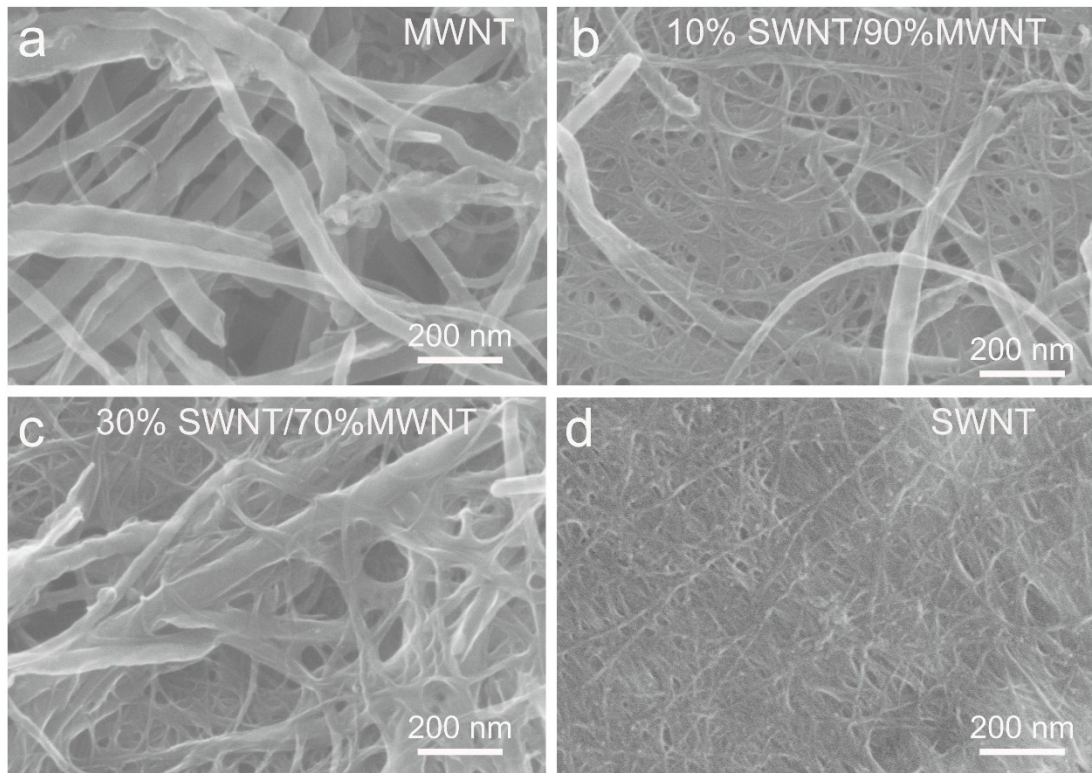

**Fig. S4.** SEM of pure CNT films: (a) MWNT film, (b) 10 wt% SWNT film, (c) 30 wt% SWNT film, (d) SWNT film.

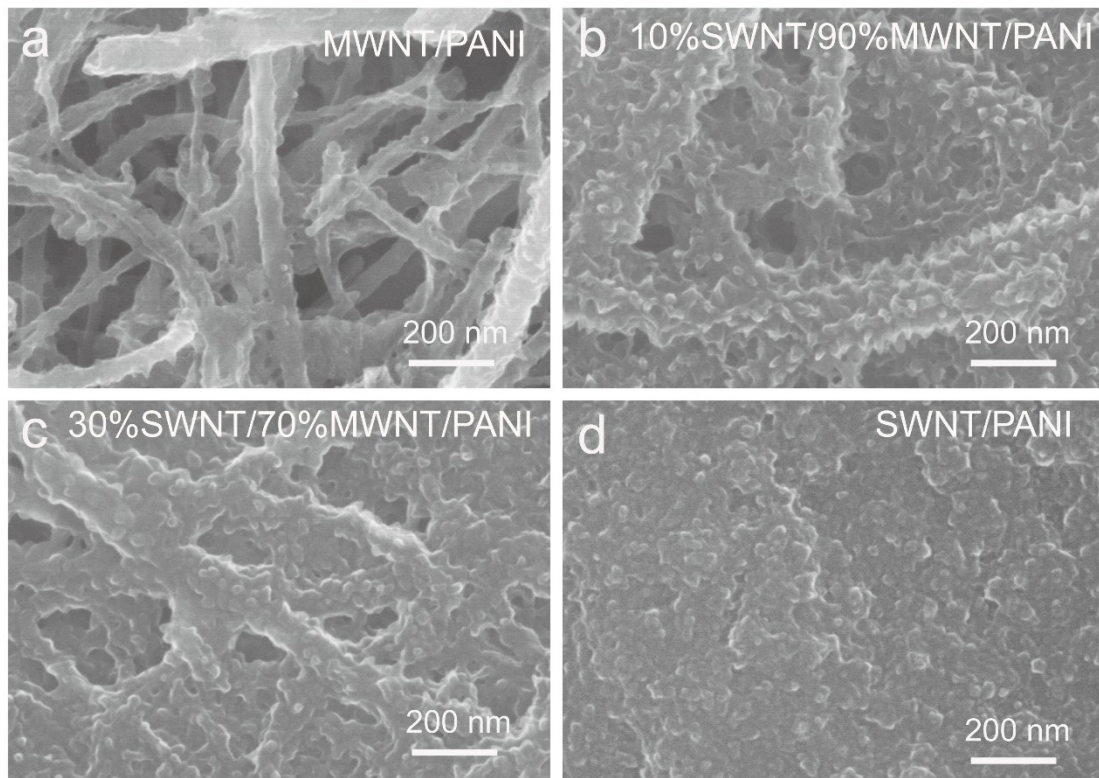

**Fig. S5.** SEM of CNT/PANI films: (a) MWNT/PANI film, (b) 10 wt% SWNT/PANI film, (c) 30 wt% SWNT/PANI film, (d) SWNT/PANI film.

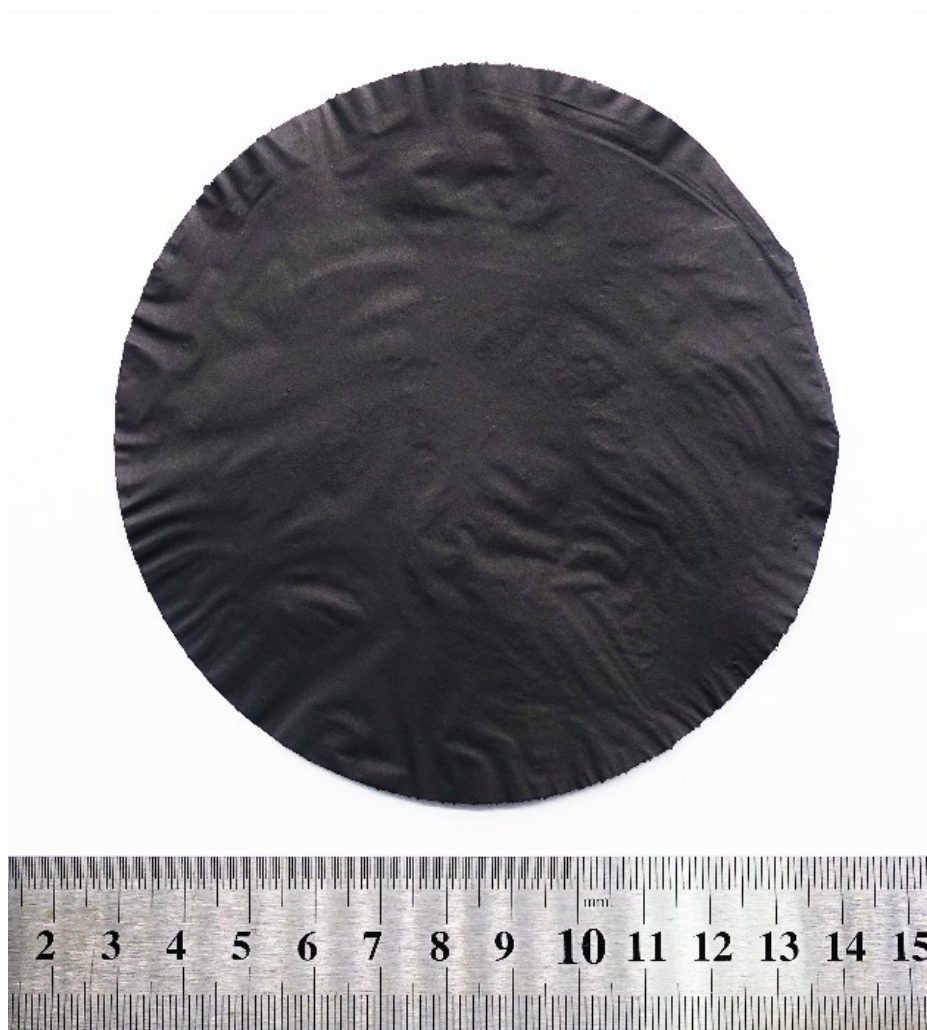

**Fig. S6.** Optical Photograph of intact 30 wt% hybrid CNT film with diameter of 11.5 cm.

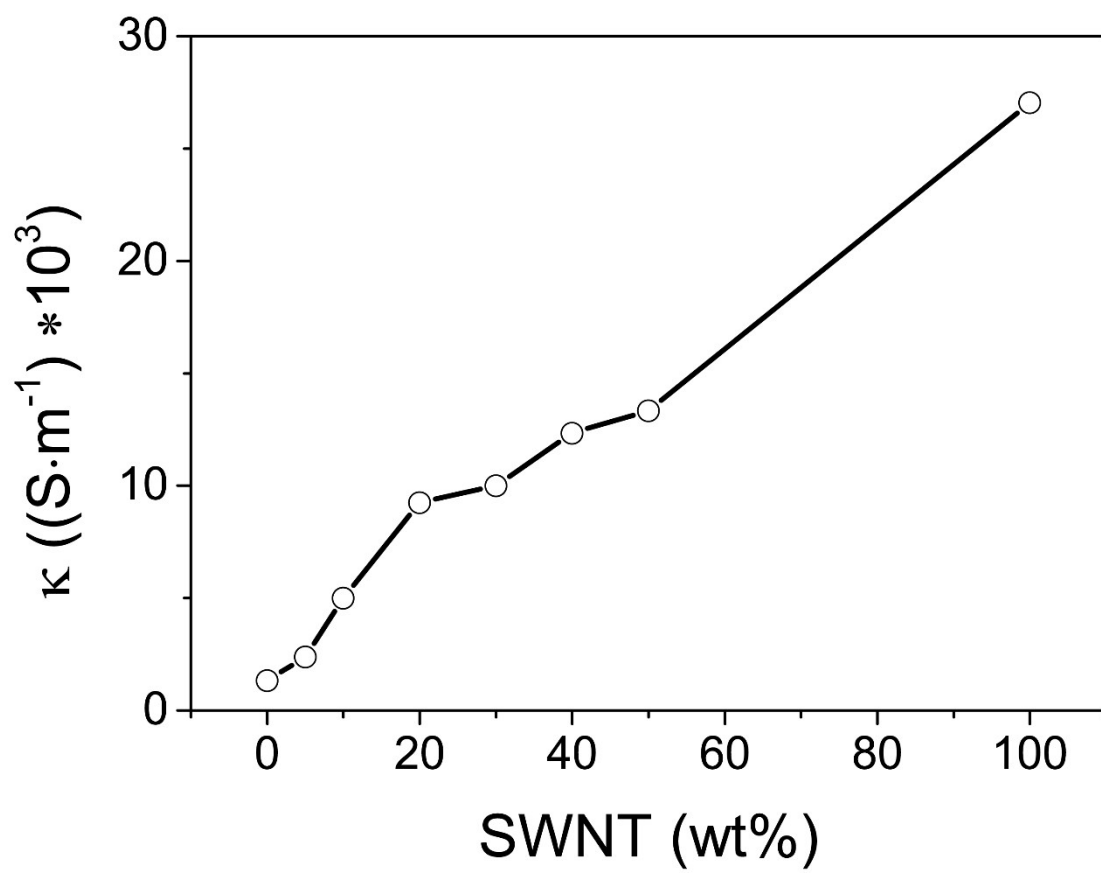

**Fig. S7.** Electrical conductivity of CNT films

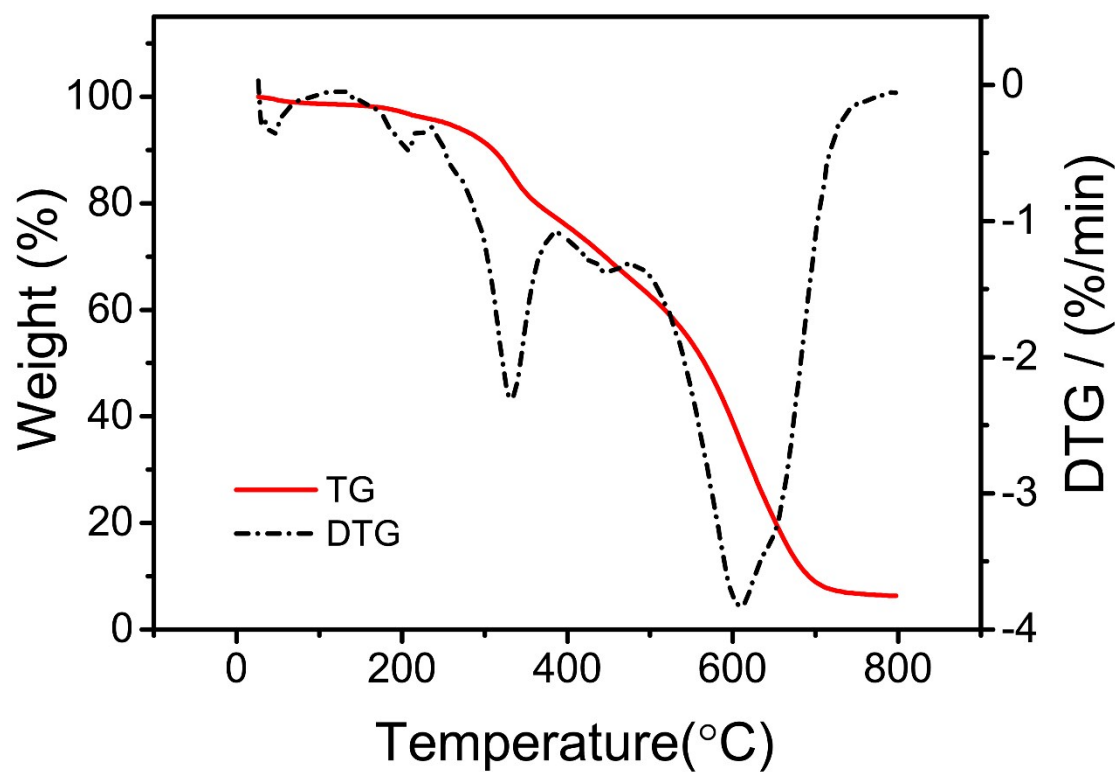

Fig. S8. TG of 30 wt% hybrid CNT film. The residual mass was no more than 5 wt%.

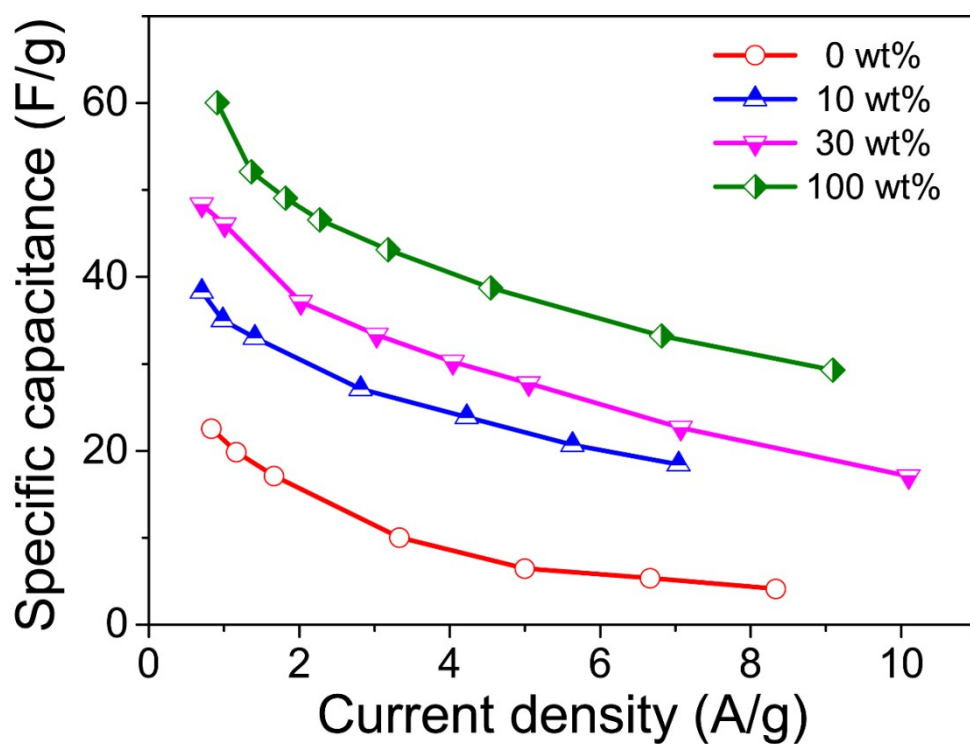

Fig. S9. Specific capacitance of pure CNT film

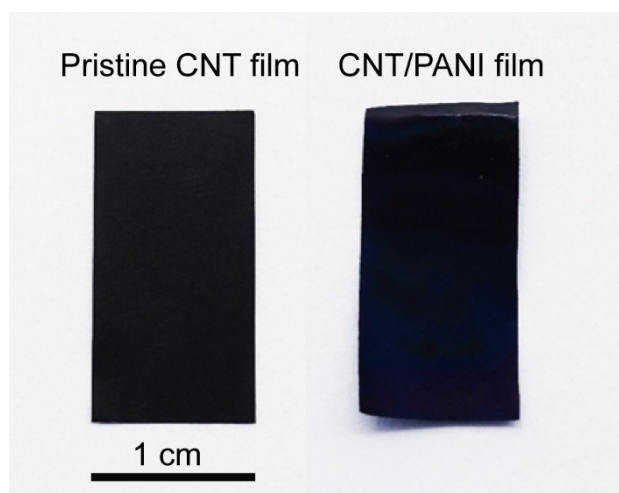

**Fig. S10.** Optical Photograph of 30 wt% hybrid CNT film before and after depositing PANI.

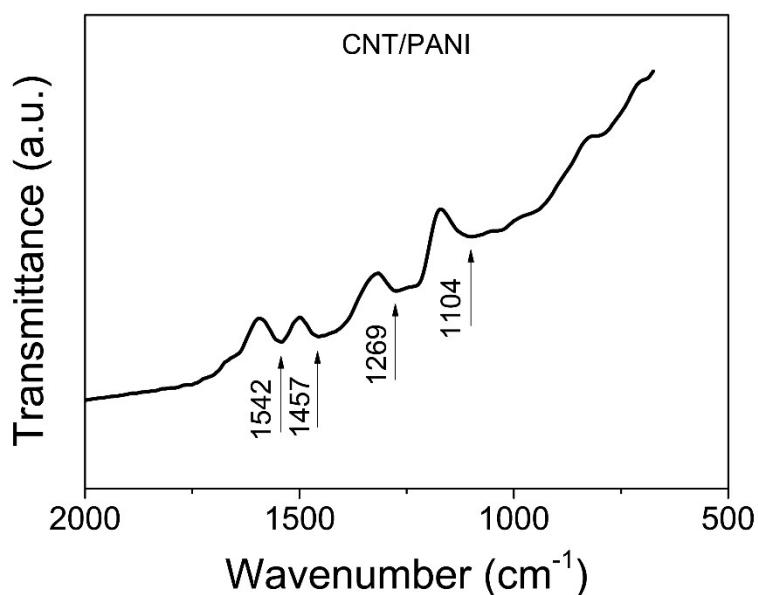

**Fig. S11.** FTIR spectra of CNT/PANI film.

Compared to the characteristic band ( $1569$ ,  $1492$ ,  $1298$  and  $1120 \text{ cm}^{-1}$ ) of PANI in the reference (J. Mater. Chem. A, 2016, 4, 3828–3834). The characteristic band of PANI in our CNT/PANI composite shifted to lower wavenumber direction. The bands at  $1542$  and  $1457 \text{ cm}^{-1}$  are assigned to C=C stretching vibrations of quinoid and benzenoid rings respectively. The bands at  $1269$ , and  $1104 \text{ cm}^{-1}$  originate from C-N and C=N stretching vibration, respectively. The results provide evidence that PANI has been successfully deposited on the CNT film.



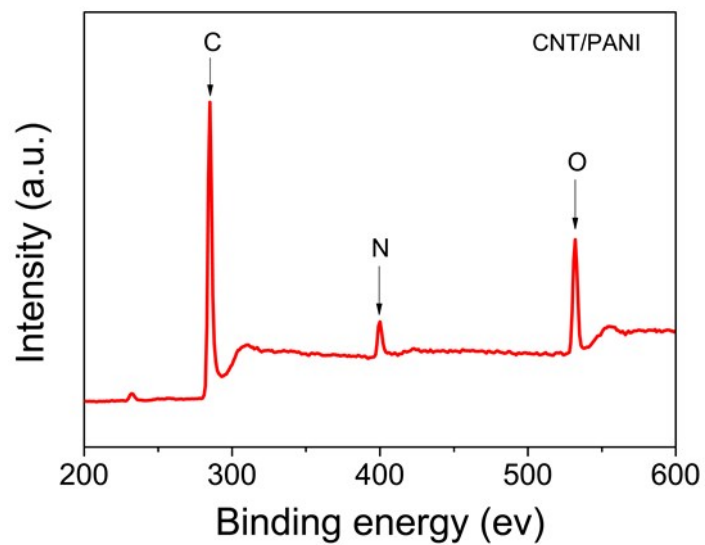

**Fig. S12.** XPS spectra of CNT/PANI film

**Table S1.** Element contents of CNT/PANI film

| Sample Name     | Element contents (Atomic %) |     |       |
|-----------------|-----------------------------|-----|-------|
|                 | C                           | N   | O     |
| <b>CNT/PANI</b> | 78.96                       | 7.3 | 13.74 |

From XPS spectra, the atomic ratio of C: N: O is 78.96: 7.3: 13.74. The high N content might be from PANI.

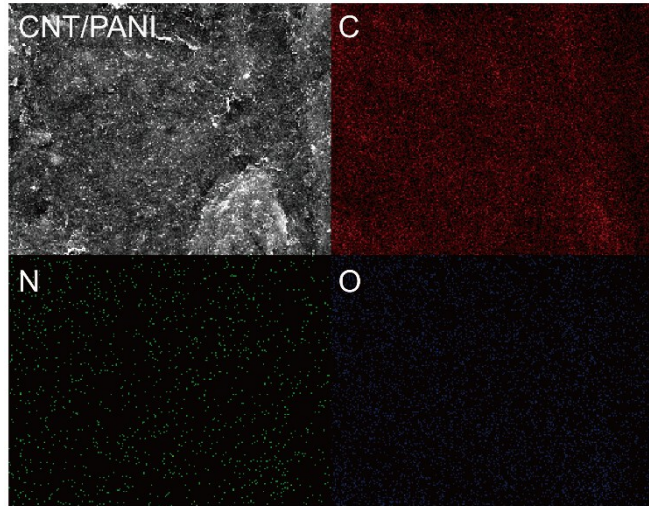

**Fig. S13.** EDX elemental mapping of CNT/PANI film. (SEM 5000x)

The element maps indicated that C, N, O were uniformly distributed.

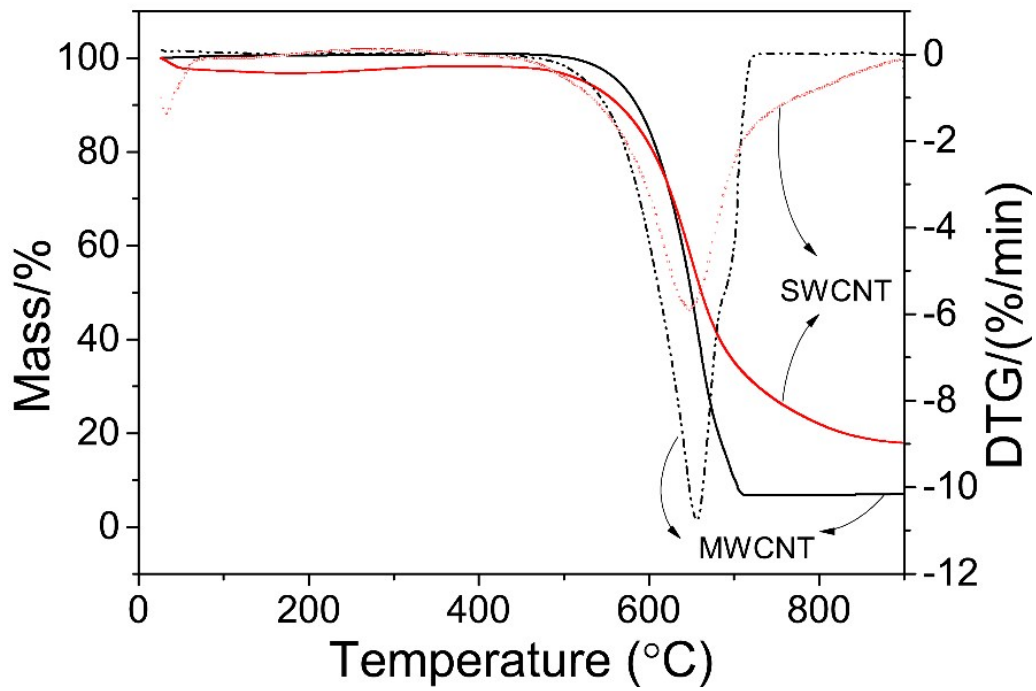

**Fig. S14.** TG of original SWCNTs and MWCNTs powder.

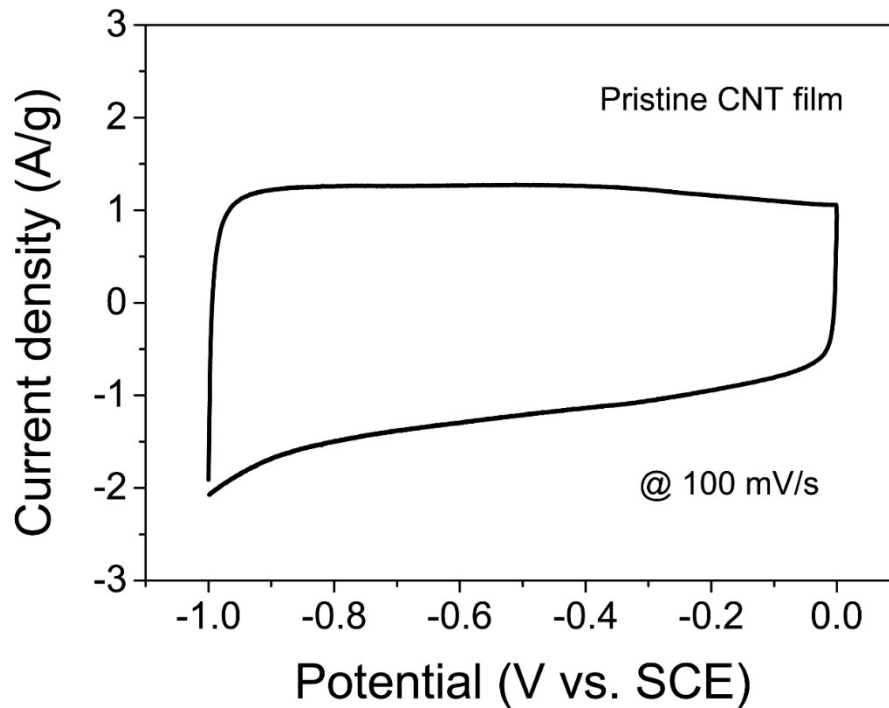

**Fig. S15.** The CV curve of pristine 30 wt% SWCNT CNT film.

We have performed thermogravimetric (TG) analysis on the raw carbon nanotubes we used for supercapacitors. The raw SWCNTs and MWCNTs powders have purities of 82 wt% and 93 wt%, respectively and the impurities are mainly amorphous carbon, catalyst and catalyst support. Cyclic voltammetry (CV) conducted on a hybrid film containing 30 wt% SWCNTs that was not electrochemically oxidized show a box feature that is consistent with the electrical double layer capacitance (**Fig. S15**). After electrochemical oxidation, the CV curves becomes non-box shaped (**Fig. 3a**) due to the introduction of oxygen containing functional groups on nanotube. These comparison results indicated that the impurity almost had no obvious effect on the capacitance behavior.

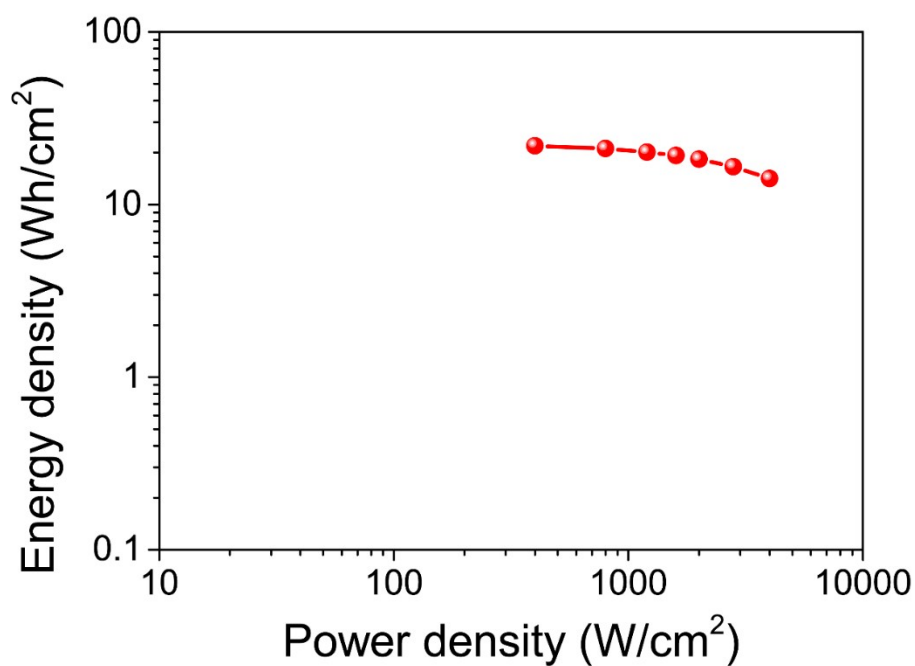

**Fig. S16.** Ragone plots showing the energy and power densities in area.

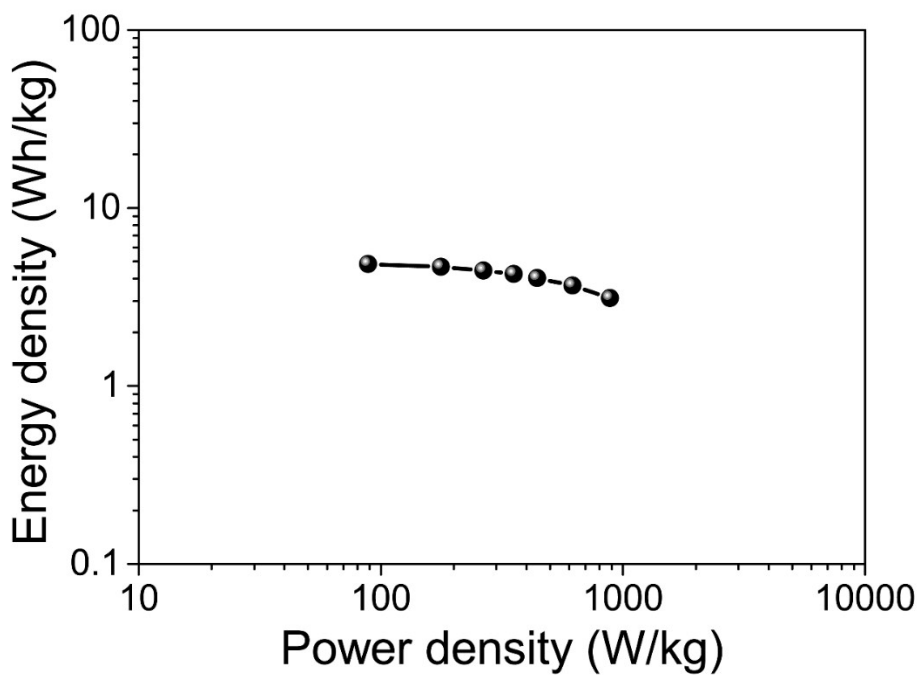

**Fig. S17.** Ragone plots showing the energy and power densities in mass. (The area was 1 cm<sup>2</sup> and mass was 4.518 mg including two electrodes)

The supercapacitor had an energy density of 21.9 Wh/cm<sup>2</sup> at 400 W/cm<sup>2</sup> and power

density of  $4000 \text{ W/cm}^2$  with an energy density of  $14.1 \text{ Wh/cm}^2$ . When it comes to mass density, the supercapacitor had an energy density of  $4.7 \text{ Wh/kg}$  at  $177.1 \text{ W/kg}$  and power density of  $885.3 \text{ W/kg}$  with an energy density of  $3.1 \text{ Wh/kg}$ .
